# Supplementary material for: Does the Infectious Status of Aphids Influence Their Preference Towards Healthy, Virus-Infected and Endophytically Colonized Plants?
Source: PubMed Central journal article supplement (PMC7412421; doi:10.3390/insects11070435), 2020-07-11
Supplement: insects-11-00435-s001.pdf [file insects-11-00435-s001.pdf]

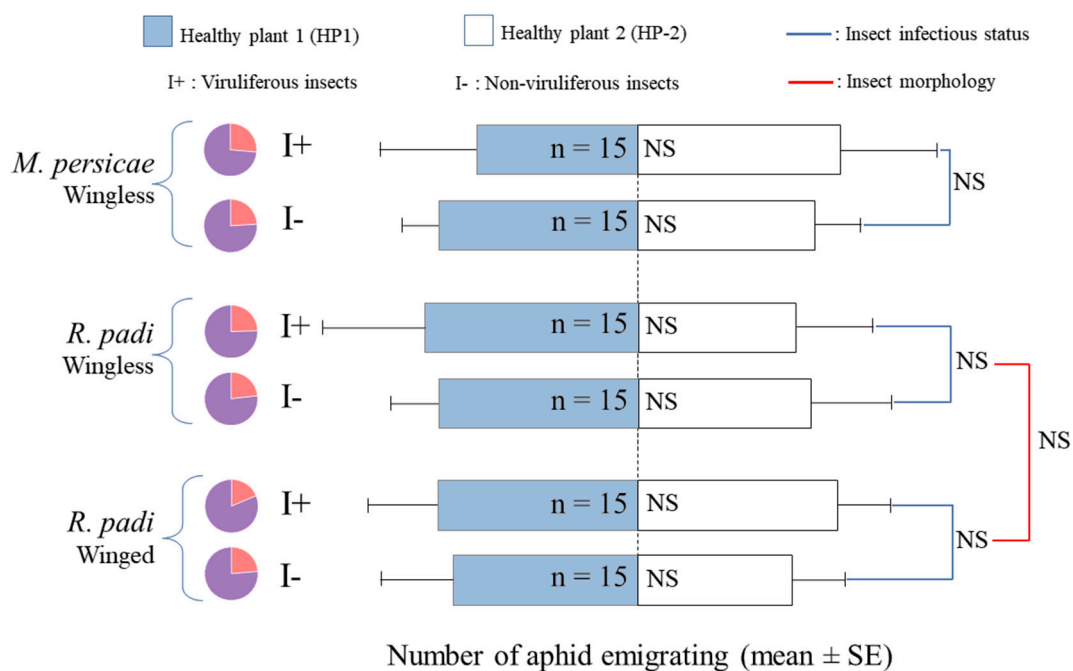

**Figure 1.** Preference tests (Mean ± SE) of insects between two healthy plants (HP). Each test was performed by releasing 20 viruliferous (I+) or non-viruliferous (I-) insects and observed after 60 min. Pie charts denote the proportion of responding (purple) versus non-responding individuals (orange). n: number of replicates; NS = not significant at  $\alpha = 0.05$ .

**Table 1.** Headspace volatile compounds of tobacco and wheat (mean  $\pm$  SEM) in nanograms per g of fresh plant, sampled over 24 h from healthy plants (HP), virus-infected plants (i.e., tobacco infected by PLRV (VP-1) and wheat infected by BYDV (VP-2)) and endophytic entomopathogenic inoculated plants comprising *Metharizium acridum* inoculated plants (MP) and *Beauveria bassiana* inoculated plants (BP). Values with different letters within each plant model in the same raw are significantly different to each other ( $p < 0.05$ ).

| Compound                                           | Chemical Family | Tobacco            |                    |                    |                    | Wheat             |                    |                    |                    |
|----------------------------------------------------|-----------------|--------------------|--------------------|--------------------|--------------------|-------------------|--------------------|--------------------|--------------------|
|                                                    |                 | HP                 | VP-1               | MP                 | BP                 | HP                | VP-2               | MP                 | BP                 |
| Glycerol.triacetate                                | Acetate         | -                  | -                  | -                  | -                  | 0 a               | 0 a                | 0.15 $\pm$ 0.06 b  | 0 a                |
| 3-Isopropenyl-2-methylcyclohexyl-acetate           | Acetate         | 0 a                | 0.72 $\pm$ 0.30 b  | 0 a                | 0 a                | -                 | -                  | -                  | -                  |
| 2-Ethyl-3-hydroxyhexyl.2-methylpropanoate          | Acid            | -                  | -                  | -                  | -                  | 0 a               | 0 a                | 0.14 $\pm$ 0.06 b  | 0 a                |
| Bis(1-chloro-2-propyl)(3-chloro-1-propyl)phosphate | Acid            | -                  | -                  | -                  | -                  | 0 a               | 0 a                | 0.63 $\pm$ 0.26 b  | 0 a                |
| 1-Hexanol,-2-ethyl                                 | Alcohol         | -                  | -                  | -                  | -                  | 2.53 $\pm$ 0.65 a | 1.96 $\pm$ 0.62 a  | 2.87 $\pm$ 0.77 a  | 1.77 $\pm$ 0.57 a  |
| Tridecan-1-ol                                      | Alcohol         | 0 a                | 1.23 $\pm$ 0.52 b  | 0.65 $\pm$ 0.18 b  | 0 a                | -                 | -                  | -                  | -                  |
| 2-Propanol-1-chloro-phosphate-(3:1)                | Alcohol         | -                  | -                  | -                  | -                  | 0 a               | 0 a                | 0.16 $\pm$ 0.07 b  | 0 a                |
| Hexadecan-1-ol                                     | Alcohol         | 0 a                | 1.25 $\pm$ 0.58 ab | 1.69 $\pm$ 0.52 b  | 0 a                | 0 a               | 0 a                | 0.13 $\pm$ 0.06 b  | 0 a                |
| Thunbergol                                         | Alcohol         | 0 a                | 1.10 $\pm$ 0.31 b  | 0.40 $\pm$ 0.18 ab | 0 a                | -                 | -                  | -                  | -                  |
| Heptanal                                           | Aldehyde        | 0 a                | 0 a                | 0.56 $\pm$ 0.17 b  | 1.37 $\pm$ 0.67 b  | 0 a               | 0 a                | 0 a                | 0.17 $\pm$ 0.07 b  |
| Octanal                                            | Aldehyde        | 0 a                | 0 a                | 0.35 $\pm$ 0.15 b  | 0 a                | 0 a               | 0 a                | 0.28 $\pm$ 0.07 b  | 0.31 $\pm$ 0.10 b  |
| Nonanal                                            | Aldehyde        | 0 a                | 0 a                | 7.53 $\pm$ 0.88 b  | 13.40 $\pm$ 2.61 c | 0.83 $\pm$ 0.08 a | 1.46 $\pm$ 0.31 ab | 2.50 $\pm$ 0.09 b  | 10.26 $\pm$ 0.67 c |
| Decanal                                            | Aldehyde        | -                  | -                  | -                  | -                  | 1.42 $\pm$ 0.23 a | 1.92 $\pm$ 0.17 ab | 2.42 $\pm$ 0.16 b  | 1.36 $\pm$ 0.15 a  |
| Pentadecanal                                       | Aldehyde        | 0 a                | 0 a                | 0.36 $\pm$ 0.16 b  | 0 a                | -                 | -                  | -                  | -                  |
| Octadecanal                                        | Aldehyde        | 12.35 $\pm$ 5.40 a | 1.09 $\pm$ 0.46 ab | 0 b                | 0 b                | -                 | -                  | -                  | -                  |
| Formamide,-N,N-dibutyl                             | Amine           | -                  | -                  | -                  | -                  | 0 a               | 0.83 $\pm$ 0.22 b  | 0.59 $\pm$ 0.26 ab | 0 a                |
| 4,8,13-Duvatriene-1,3-diol                         | Diol            | 0 a                | 1.90 $\pm$ 0.84 b  | 0 a                | 0 a                | -                 | -                  | -                  | -                  |
| Ethylether                                         | Ether           | 10.29 $\pm$ 4.64 a | 0 b                | 0 b                | 4.31 $\pm$ 0.67 a  | -                 | -                  | -                  | -                  |
| 1-Pentene,-2-methyl                                | Hydrocarbon     | 0 a                | 0 a                | 0 a                | 9.34 $\pm$ 4.74 b  | -                 | -                  | -                  | -                  |
| Benzene                                            | Hydrocarbon     | 0 a                | 1.04 $\pm$ 0.59 b  | 0 a                | 0 a                | -                 | -                  | -                  | -                  |
| Hexadecane                                         | Hydrocarbon     | 0 a                | 1.10 $\pm$ 0.46 b  | 0 a                | 0 a                | 1.43 $\pm$ 0.18 a | 1.49 $\pm$ 0.19 a  | 5.30 $\pm$ 0.74 b  | 1.33 $\pm$ 0.20 a  |
| Heptadecane                                        | Hydrocarbon     | 0 a                | 0.95 $\pm$ 0.67 b  | 0 a                | 0 a                | -                 | -                  | -                  | -                  |
| Nonadecane                                         | Hydrocarbon     | -                  | -                  | -                  | -                  | 0 a               | 0 a                | 0 a                | 0.18 $\pm$ 0.08 b  |
| Eicosane                                           | Hydrocarbon     | 0 a                | 1.37 $\pm$ 0.36 b  | 0 a                | 0 a                | -                 | -                  | -                  | -                  |
| Solanone                                           | Ketone          | 0 a                | 0 a                | 2.26 $\pm$ 0.53 b  | 5.02 $\pm$ 2.26 b  | -                 | -                  | -                  | -                  |
| beta.-Ionone                                       | Ketone          | -                  | -                  | -                  | -                  | 0 a               | 0 a                | 0.54 $\pm$ 0.14 b  | 0.73 $\pm$ 0.34 b  |
| Dihydroactinidolide                                | Ketone          | -                  | -                  | -                  | -                  | 0 a               | 0 a                | 0 a                | 0.63 $\pm$ 0.18 b  |
| 6,10,14-Trimethylpentadecan-2-one                  | Ketone          | -                  | -                  | -                  | -                  | 1.31 $\pm$ 0.25 a | 0.41 $\pm$ 0.17 a  | 0.37 $\pm$ 0.12 a  | 1.30 $\pm$ 0.54 a  |
| Solavetivone                                       | Ketone          | 0 a                | 0 a                | 0 a                | 1.17 $\pm$ 0.53 b  | -                 | -                  | -                  | -                  |
| 2-Pentadecanone,-6,10,14-trimethyl                 | Ketone          | 0 a                | 0.28 $\pm$ 0.12 b  | 0 a                | 0 a                | -                 | -                  | -                  | -                  |
| Butylhydroxytoluene                                | Phenol          | -                  | -                  | -                  | -                  | 1.11 $\pm$ 0.46 a | 0 b                | 0.20 $\pm$ 0.09 b  | 0 b                |
| Alpha-Pinene                                       | Terpene         | -                  | -                  | -                  | -                  | 0.77 $\pm$ 0.36 a | 0 b                | 0 b                | 0.24 $\pm$ 0.11 ab |
| Neophytadiene                                      | Terpene         | 12.64 $\pm$ 5.31 a | 3.95 $\pm$ 1.12 a  | 3.81 $\pm$ 0.64 a  | 2.12 $\pm$ 0.65 a  | -                 | -                  | -                  | -                  |
| Cembrene                                           | Terpene         | 0 a                | 0.48 $\pm$ 0.22 b  | 0.57 $\pm$ 0.07 b  | 0 a                | -                 | -                  | -                  | -                  |
| Unidentified-compound                              | -               | 0 a                | 0.18 $\pm$ 0.08 b  | 0 a                | 0 a                | -                 | -                  | -                  | -                  |

**Table 2.** Summary of pairwise comparisons of volatile profiles between different treatments for tobacco and wheat models. HP: healthy plants, VP: virus-infected plants (comprising tobacco infected by PLRV (VP-1) and wheat infected by BYDV (VP-2)), MP: *Metharizium acridum* inoculated plants (MP) and BP: *Beauveria bassiana* inoculated plants. “\*” and “ns” for  $p \leq 0.05$  and not significant at  $\alpha = 0.05$ , respectively.

|          | Tobacco |            |    | Wheat |            |    |
|----------|---------|------------|----|-------|------------|----|
|          | F       | p-adjusted |    | F     | p-adjusted |    |
| HP vs VP | 4.75    | 0.036      | *  | 3.86  | 0.108      | ns |
| HP vs MP | 10.87   | 0.048      | *  | 11.26 | 0.078      | ns |
| HP vs BP | 5.88    | 0.042      | *  | 17.84 | 0.030      | *  |
| VP vs MP | 7.56    | 0.060      | ns | 7.67  | 0.030      | *  |
| VP vs BP | 8.03    | 0.048      | *  | 19.99 | 0.036      | *  |
| BP vs MP | 9.11    | 0.072      | ns | 22.90 | 0.030      | *  |
